# Supplementary material for: Insights from multi-spectroscopic analysis and molecular modeling to understand the structure–affinity relationship and the interaction mechanism of flavonoids with gliadin
Source: Royal Society of Chemistry journal article supplement (doi:10.1039/d1fo03816h), 2022-01-01
Supplement: d1fo03816h1.pdf [file d1fo03816h1.pdf]

## Supporting Information

### Insights from multi-spectroscopic analysis and molecular modeling to understand the structure-affinity relationship and interaction mechanism of flavonoids with gliadin

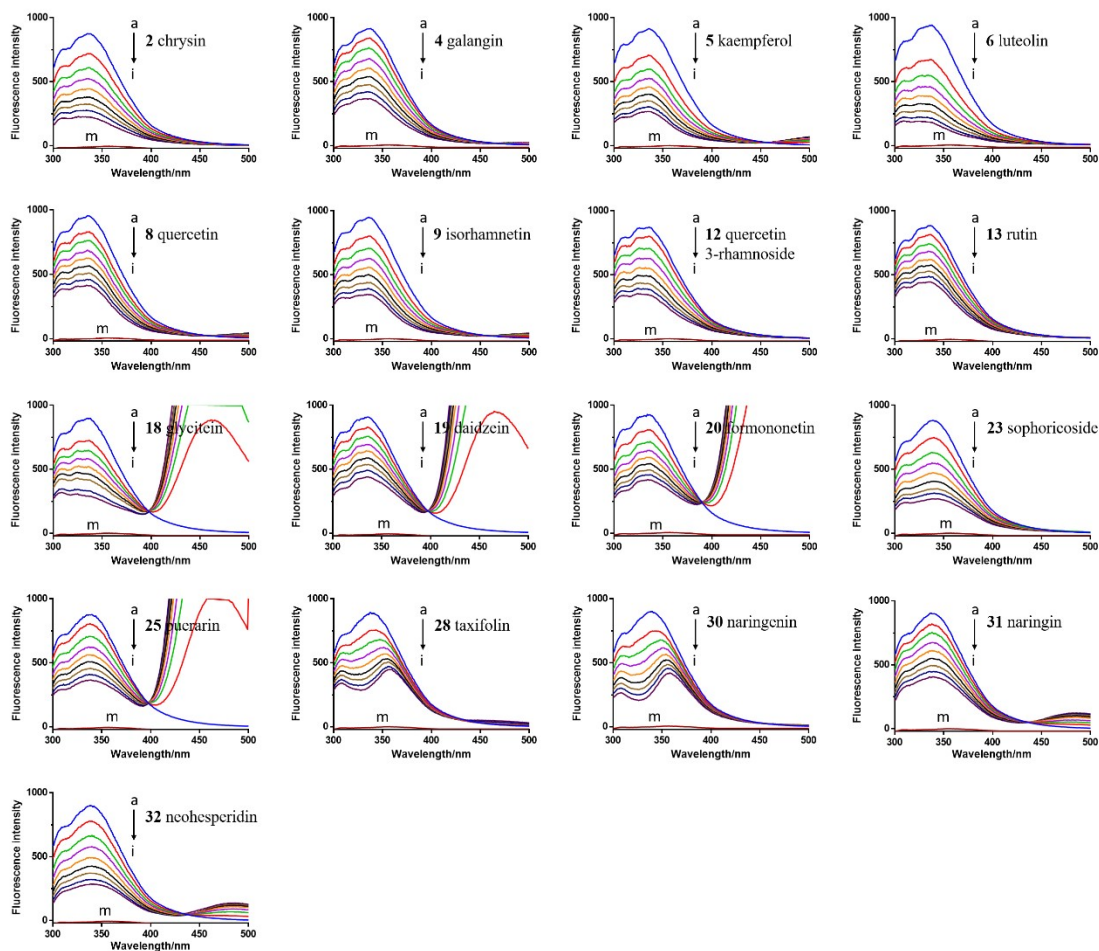

**Figure S1** Fluorescence quenching spectra of gliadin with flavonoids (curves a→i denote the concentration of flavonoids at 0, 2.28, 4.57, 6.85, 9.12, 11.39, 13.67, 15.94, 18.2  $\mu\text{M}$ , and curve m denotes the fluorescence emission spectrum of flavonoid only).

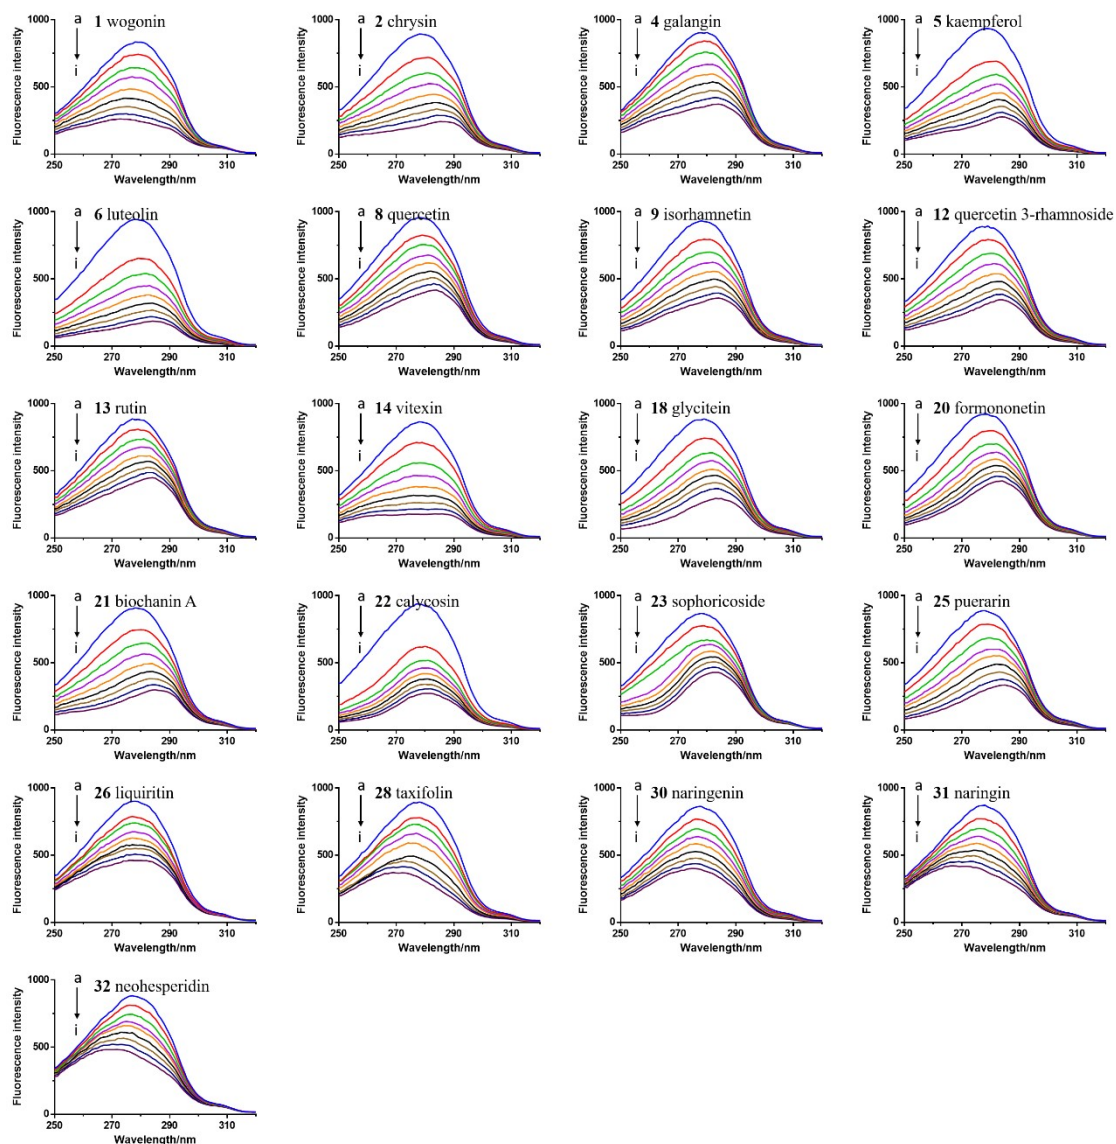

**Figure S2** The fluorescence excitation quenching spectra of gliadin with flavonoids (curves a→i denote the concentration of flavonoids at 0, 2.28, 4.57, 6.85, 9.12, 11.39, 13.67, 15.94, 18.2  $\mu\text{M}$ ).

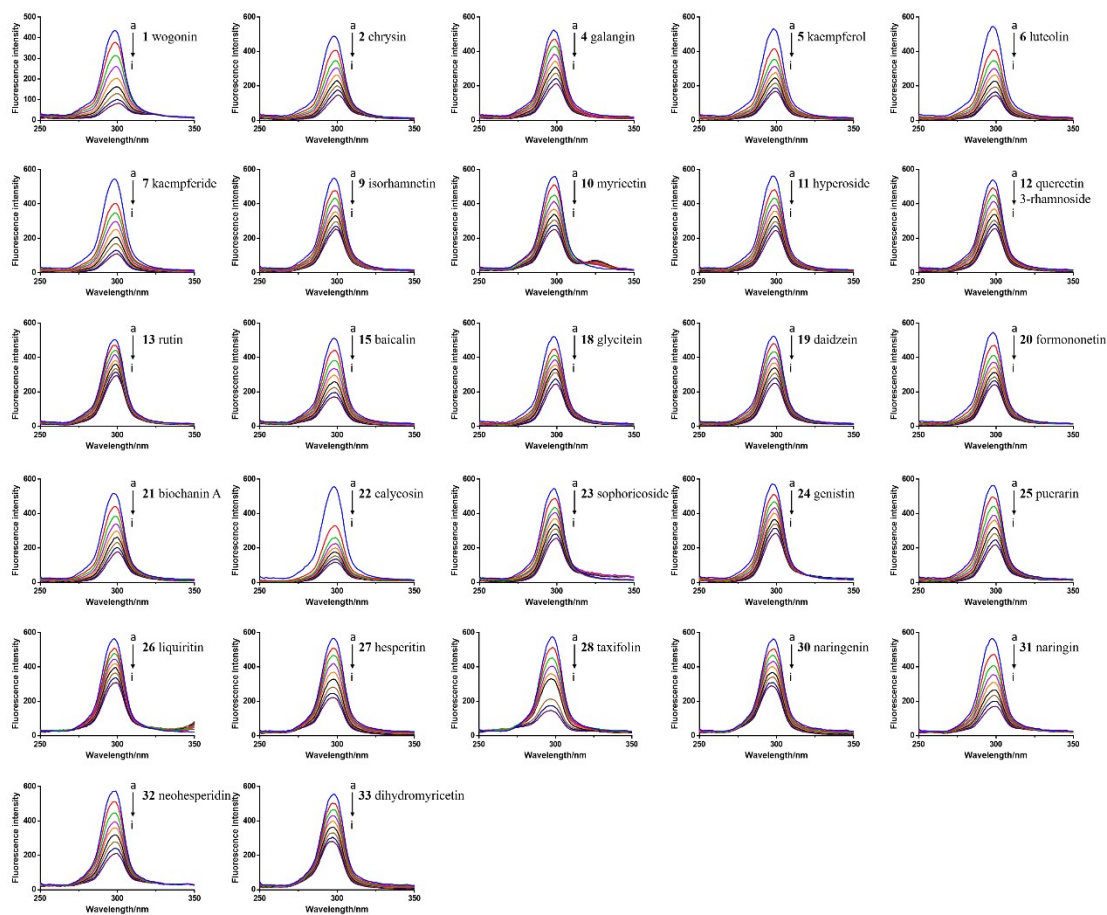

**Figure S3** Synchronous fluorescence spectra of gliadin with flavonoids at  $\Delta\lambda = 15$  nm (curves a→i denote the concentration of flavonoids at 0, 2.28, 4.57, 6.85, 9.12, 11.39, 13.67, 15.94, 18.2  $\mu$ M).

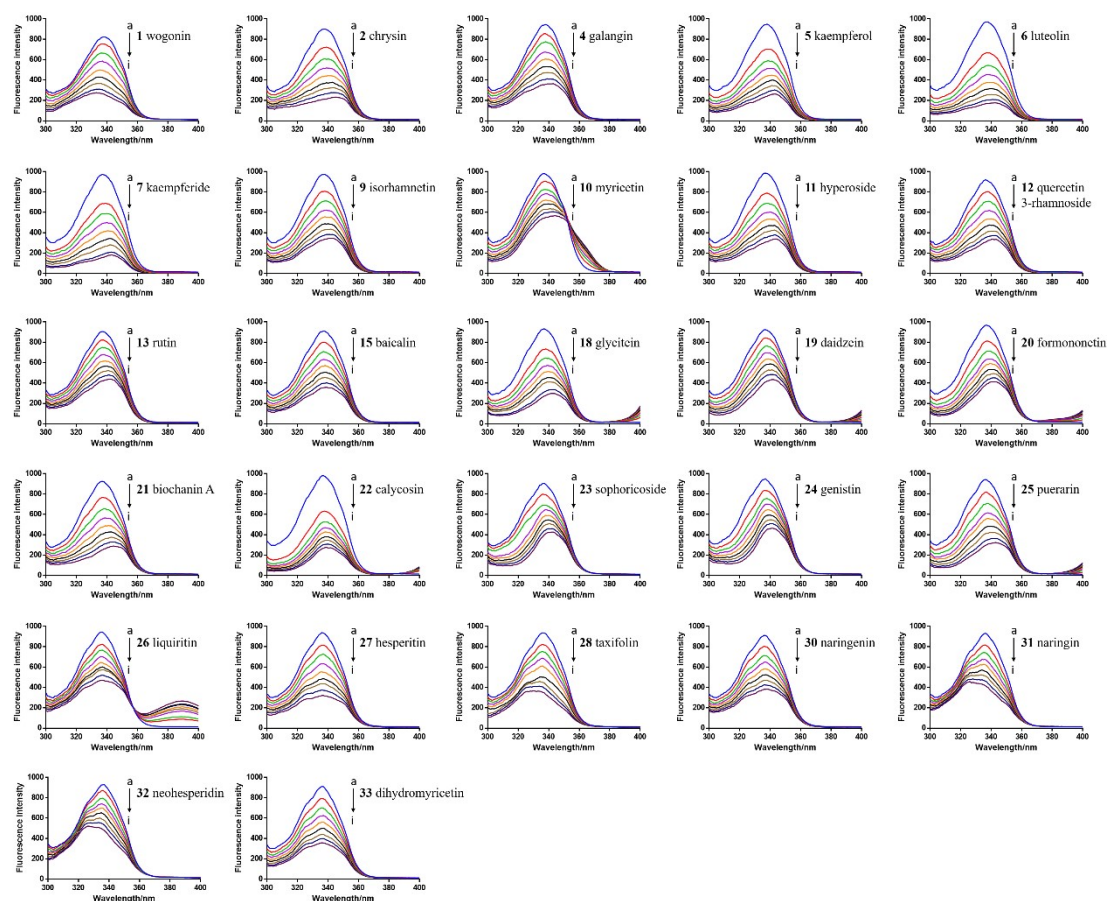

**Figure S4** Synchronous fluorescence spectra of gliadin with flavonoids at  $\Delta\lambda = 60$  nm (curves a→i denote the concentration of flavonoids at 0, 2.28, 4.57, 6.85, 9.12, 11.39, 13.67, 15.94, 18.2  $\mu$ M).

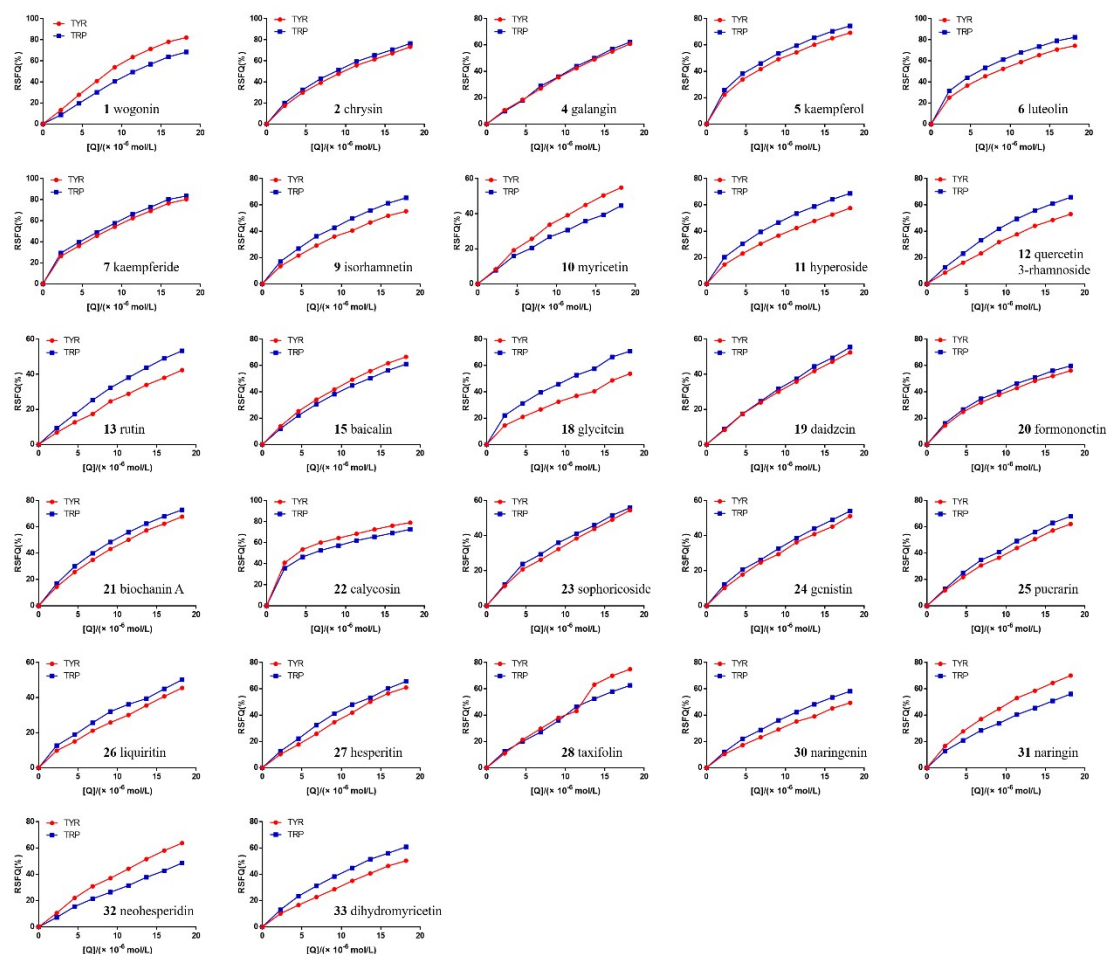

**Figure S5** The RSFQ values of Tyr and Trp residues of gliadin at different concentrations of flavonoids.
